# Supplementary material for: Genetics of osteopontin in patients with chronic kidney disease: The German Chronic Kidney Disease study
Source: PubMed Central journal article supplement (PMC9015153; doi:10.1371/journal.pgen.1010139), 2022-04-06
Supplement: pgen.1010139.s001.pdf [file pgen.1010139.s001.pdf]

**S1 Figure:** Flow chart showing exclusion of patients and analysis sets.

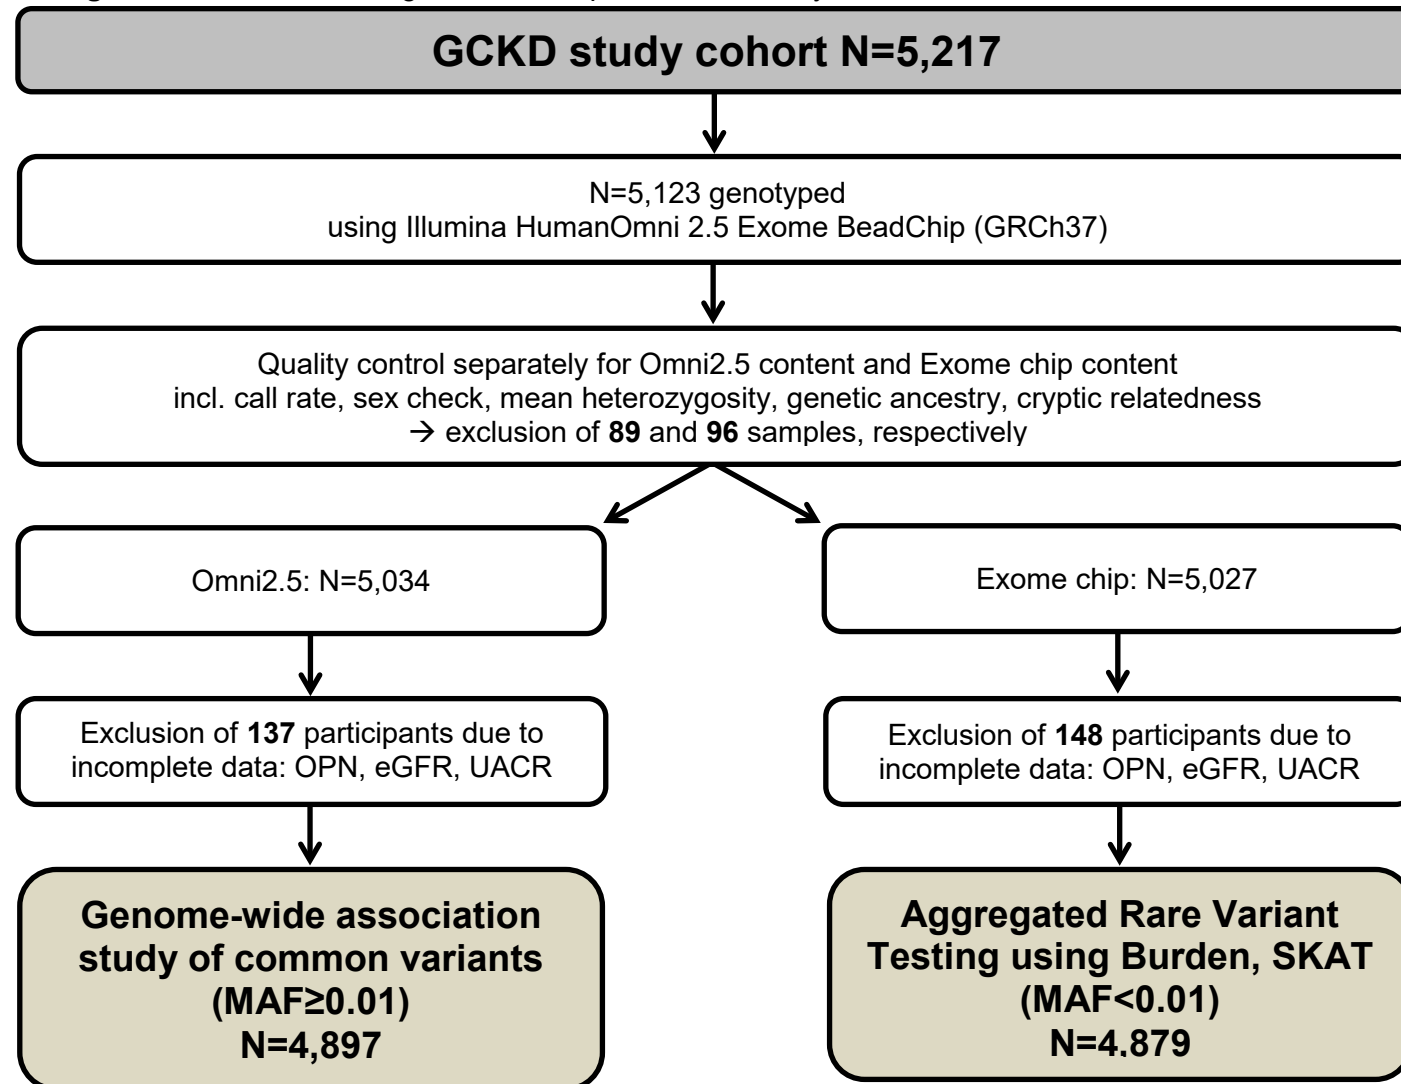

OPN: osteopontin; eGFR: estimated glomerular filtration rate; UACR: urinary albumin to creatinine ratio; SKAT: sequence kernel association test; MAF: minor allele frequency
