# Supplementary material for: Genetics of osteopontin in patients with chronic kidney disease: The German Chronic Kidney Disease study
Source: PubMed Central journal article supplement (PMC9015153; doi:10.1371/journal.pgen.1010139), 2022-04-06
Supplement: pgen.1010139.s004.pdf [file pgen.1010139.s004.pdf]

**S4 Figure:** Manhattan plot of results from GWAS of  $\log_2(\text{OPN})$ .

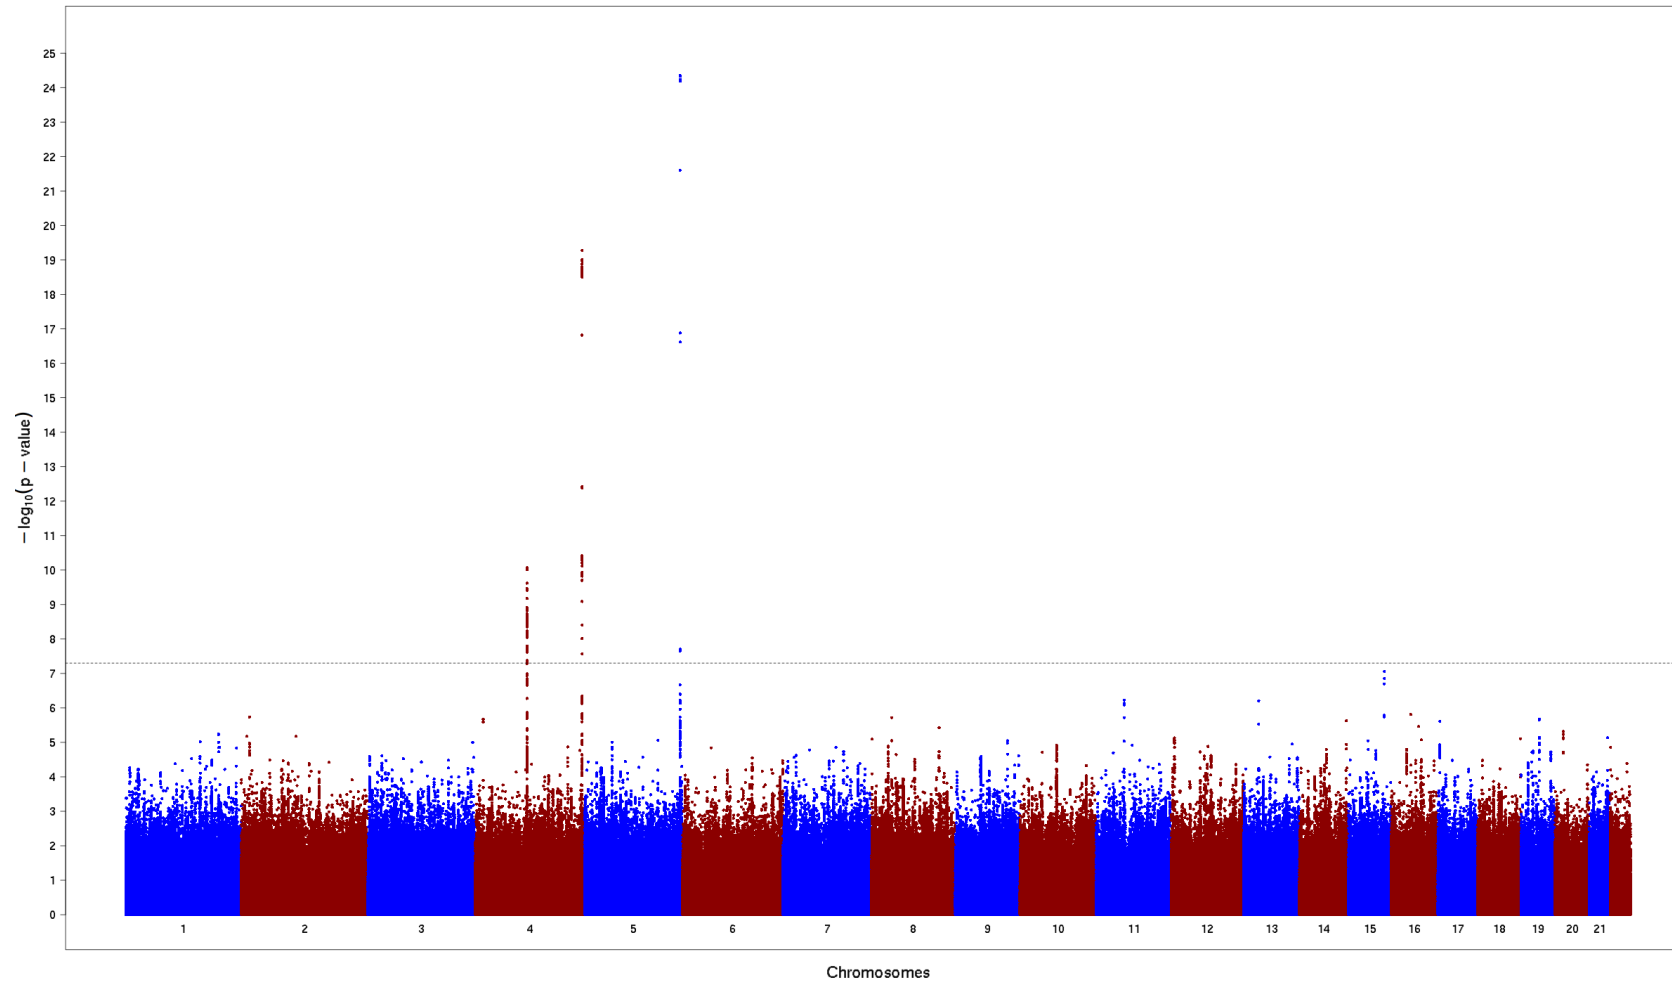

x-axis: chromosomal position (GRCh37); y-axis:  $-\log_{10}$ -transformed p-values; grey line: genome-wide significance level ( $5.0\text{E}-08$ ). Association analysis based on imputed dosage data (additive genetic model) was adjusted for age, sex,  $\log(\text{eGFR})$ , and  $\log(\text{UACR})$ . Results were filtered for  $\text{MAF} \geq 0.01$ .
