# Supplementary material for: Genetics of osteopontin in patients with chronic kidney disease: The German Chronic Kidney Disease study
Source: PubMed Central journal article supplement (PMC9015153; doi:10.1371/journal.pgen.1010139), 2022-04-06
Supplement: pgen.1010139.s005.pdf [file pgen.1010139.s005.pdf]

**S5 Figure:** Regional association plots obtained in the course of conditional analysis to identify independent signals.

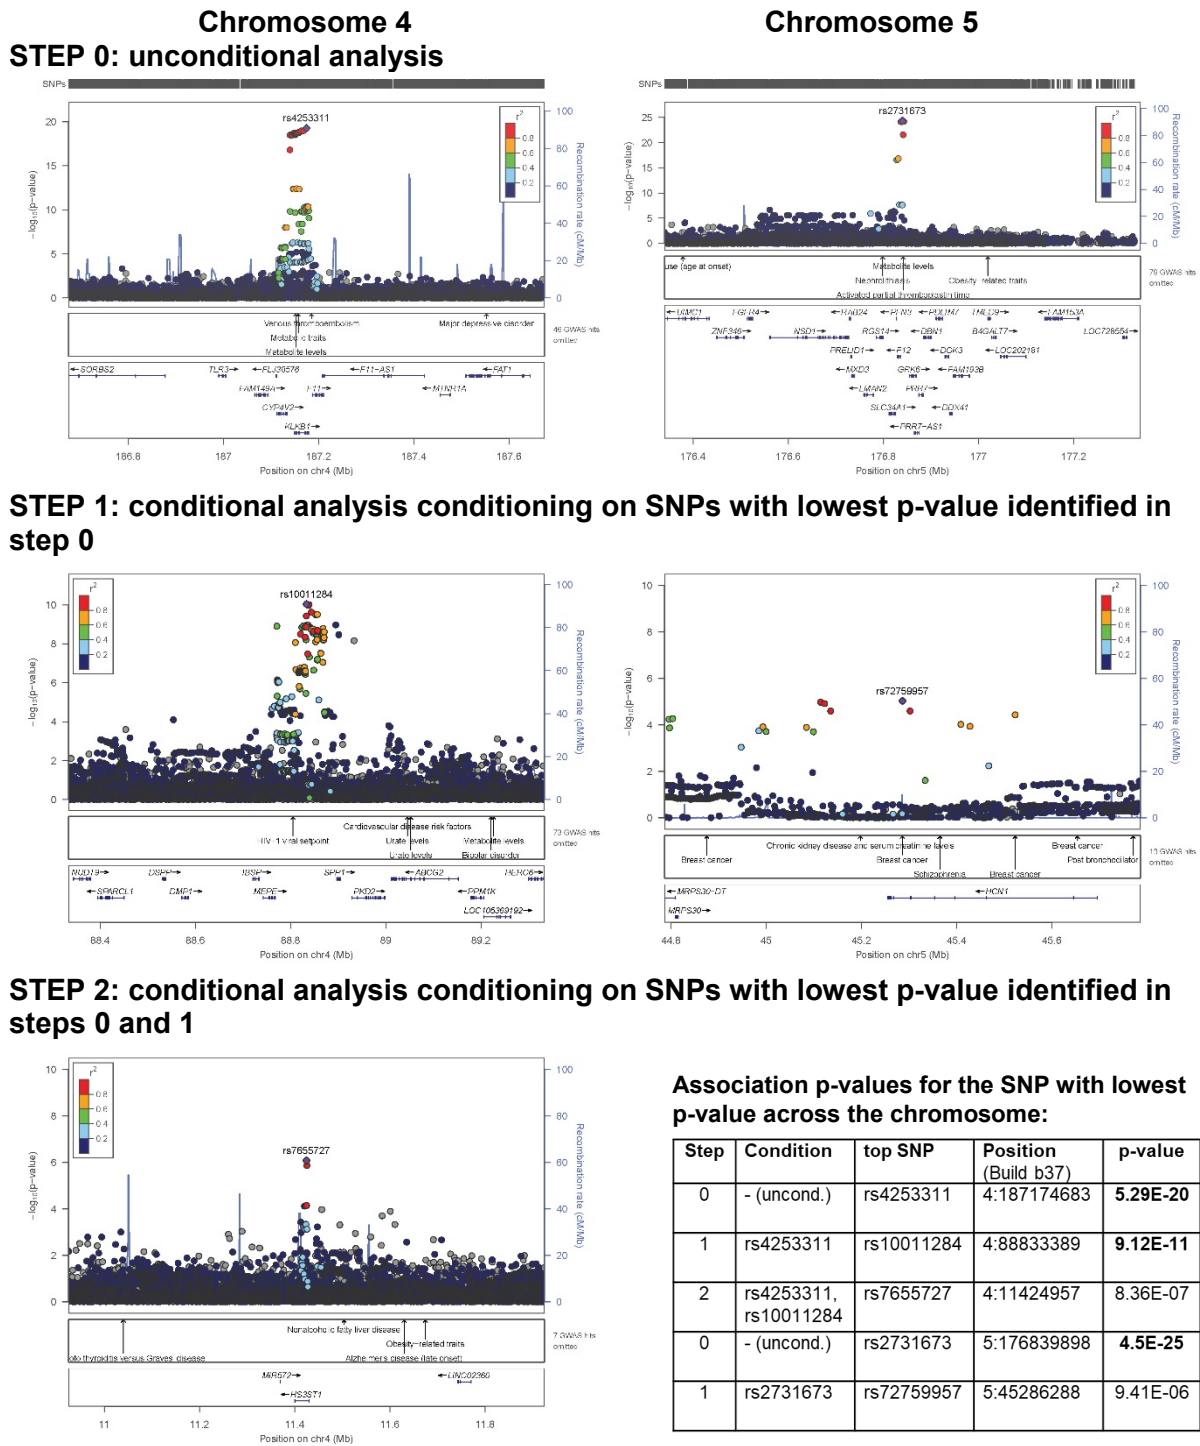

For each chromosome with genome-wide significant associations, a conditional analysis run was the SNP with the lowest association p-value across the chromosome. This procedure was repeated until no further genome-wide significant association was observed. Step 0 corresponds to the unconditional analysis.
