# Supplementary material for: Genetics of osteopontin in patients with chronic kidney disease: The German Chronic Kidney Disease study
Source: PubMed Central journal article supplement (PMC9015153; doi:10.1371/journal.pgen.1010139), 2022-04-06
Supplement: pgen.1010139.s006.pdf [file pgen.1010139.s006.pdf]

**S6 Figure:** Levels of osteopontin (log<sub>2</sub>-transformed) in the overall cohort and across genotypes of discovered SNPs in GCKD.

(A) GCKD overall

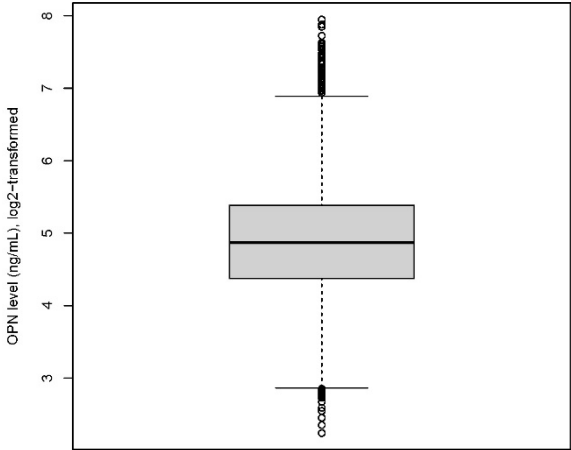

(B) rs10011284 (4:88833389)

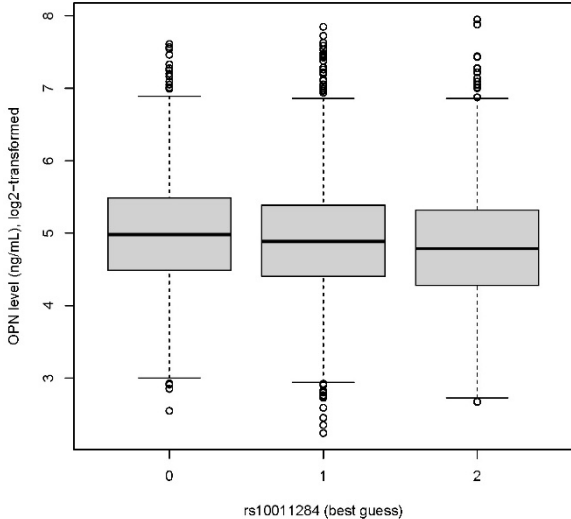

(C) rs4253311 (4:187174683)

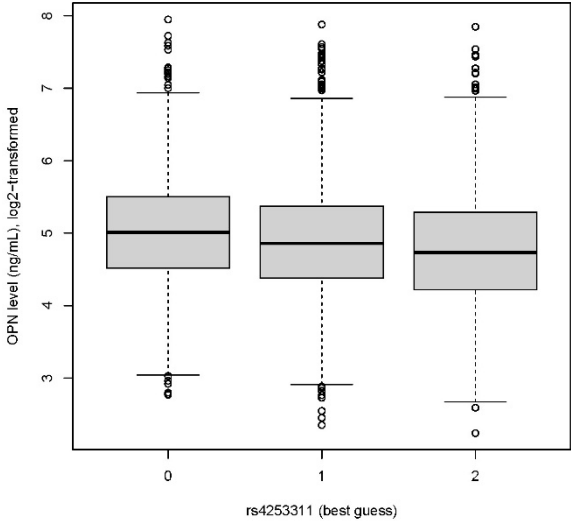

(D) rs2731673 (5:176839898)

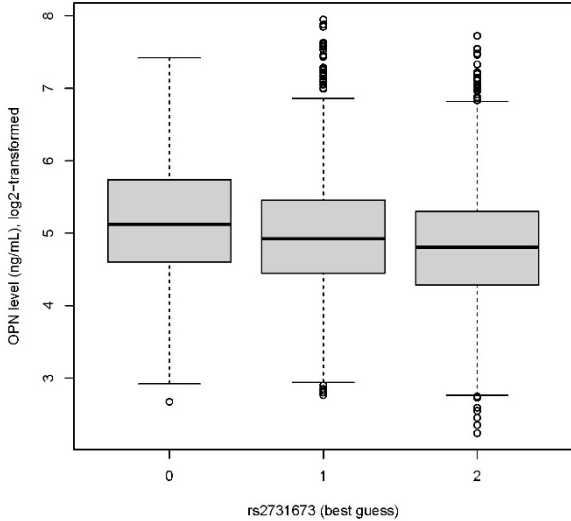

For the purpose of presentation, dosages of SNPs were transformed into best guess genotypes.
