# Supplementary material for: Genetics of osteopontin in patients with chronic kidney disease: The German Chronic Kidney Disease study
Source: PubMed Central journal article supplement (PMC9015153; doi:10.1371/journal.pgen.1010139), 2022-04-06
Supplement: pgen.1010139.s007.pdf [file pgen.1010139.s007.pdf]

**S7 Figure:** Regional association plots for the region around rs2731673 on chromosome 5.

(A) GCKD study (discovery)

(B) YFS cohort (replication)

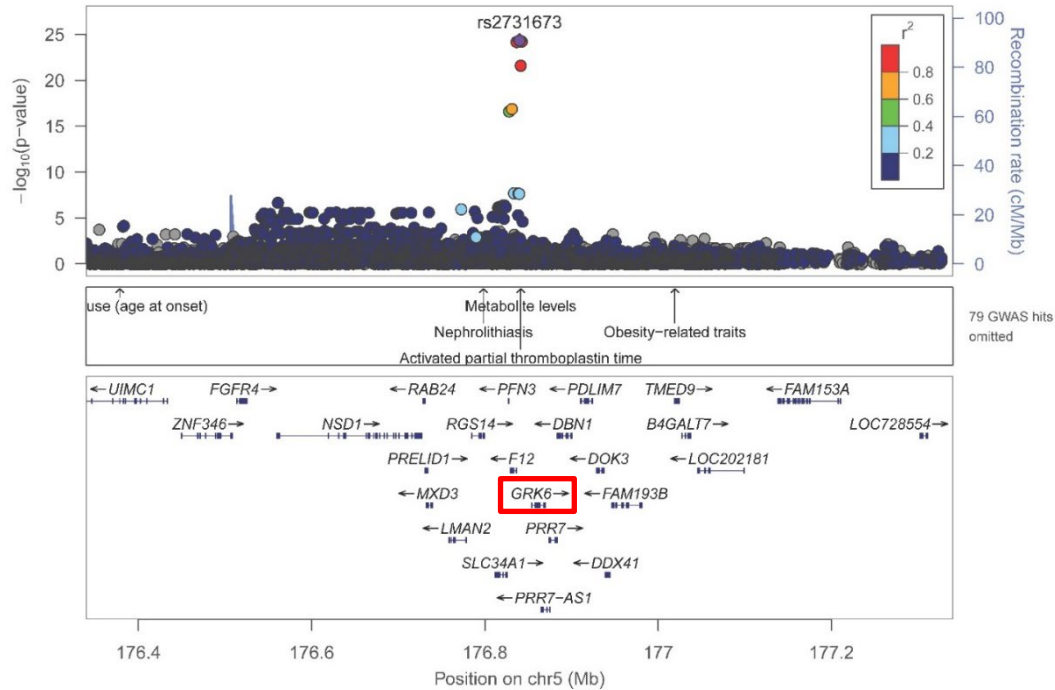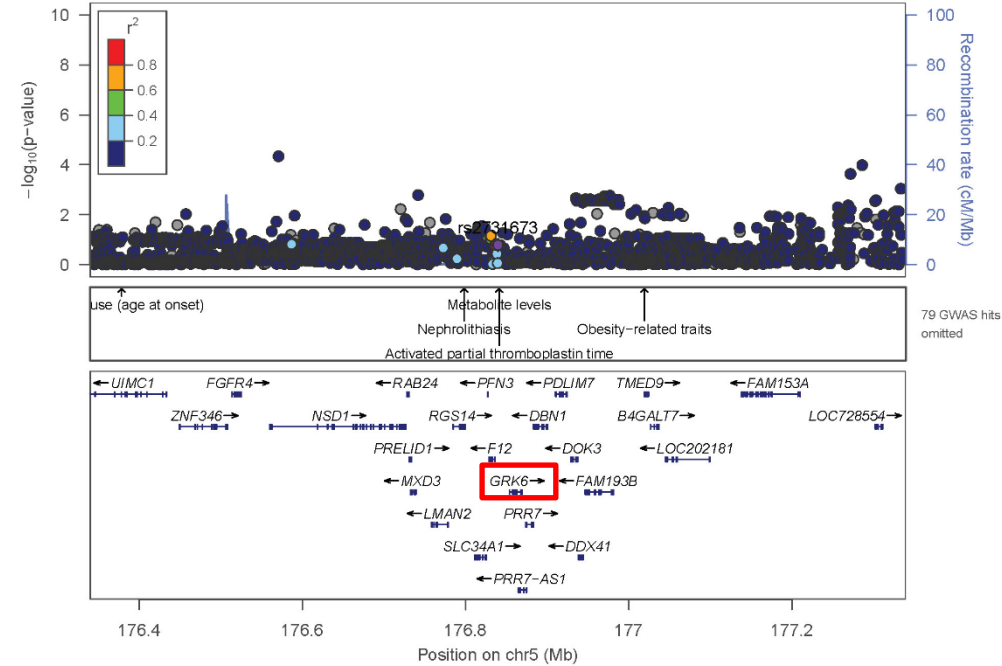

x-axis: chromosomal position; y-axis: left - association p-values (-

$\log_{10}$ -transformed), right – genetic recombination rates

Plot shows the association results around the most strongly associated SNP of this region (purple diamond); SNP colors reflect LD correlation ( $r^2$ ) using 1000G EUR population as reference.
