# Supplementary material for: Genetics of osteopontin in patients with chronic kidney disease: The German Chronic Kidney Disease study
Source: PubMed Central journal article supplement (PMC9015153; doi:10.1371/journal.pgen.1010139), 2022-04-06
Supplement: pgen.1010139.s008.pdf [file pgen.1010139.s008.pdf]

**S8 Figure:** Effects of rs10011284 and rs4253311 (chromosome 4) on OPN levels.

(A) rs10011284 (4:88833389)

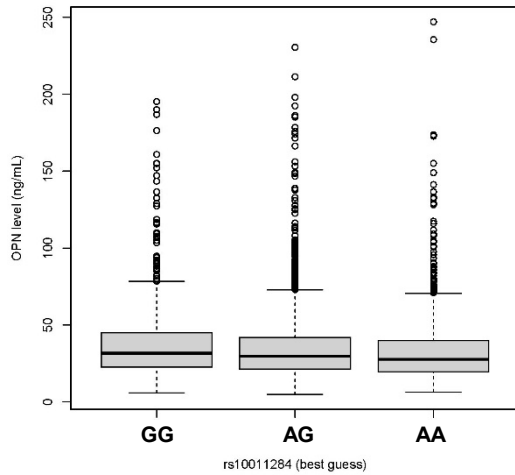

(B) rs4253311 (4:187174683)

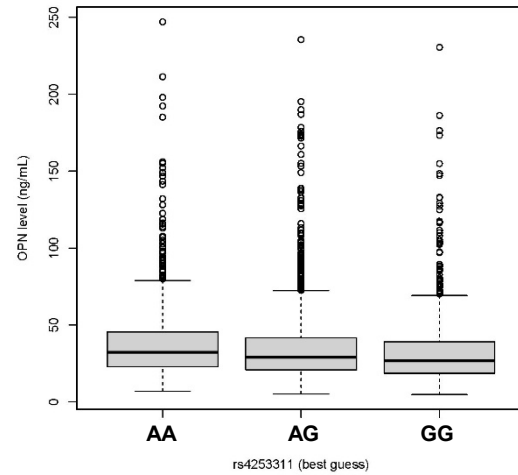

(C) any combination of both SNPs

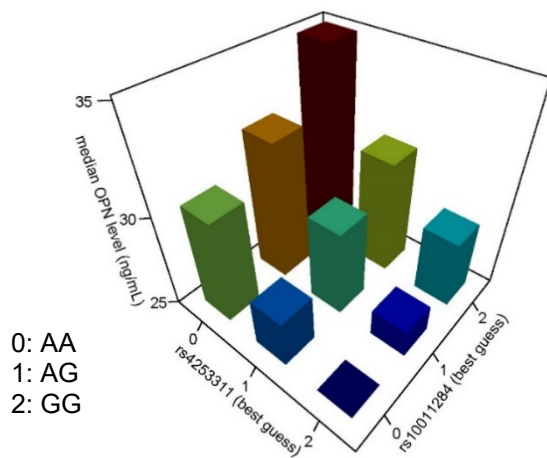

|                         |    | rs4253311 (best guess) |      |      | Total |
|-------------------------|----|------------------------|------|------|-------|
|                         |    | GG                     | AG   | AA   |       |
| rs10011284 (best guess) | AA | 236                    | 475  | 228  | 939   |
|                         | AG | 585                    | 1193 | 588  | 2366  |
|                         | GG | 398                    | 784  | 410  | 1592  |
| Total                   |    | 1219                   | 2452 | 1226 | 4897  |

For the presentations, dosage information was transformed into best guess genotypes. The accompanying table presents observed frequencies of alleles and their combinations in the GCKD study. A formal test for multiplicative interaction of both SNPs on OPN levels was not significant ( $p=9.96E-01$ ).

Human genome build: GRCh37
