# Supplementary material for: Genetics of osteopontin in patients with chronic kidney disease: The German Chronic Kidney Disease study
Source: PubMed Central journal article supplement (PMC9015153; doi:10.1371/journal.pgen.1010139), 2022-04-06
Supplement: pgen.1010139.s009.pdf [file pgen.1010139.s009.pdf]

S9 Figure: Relationship of selected GO terms.

(A) Reference: GO cellular component

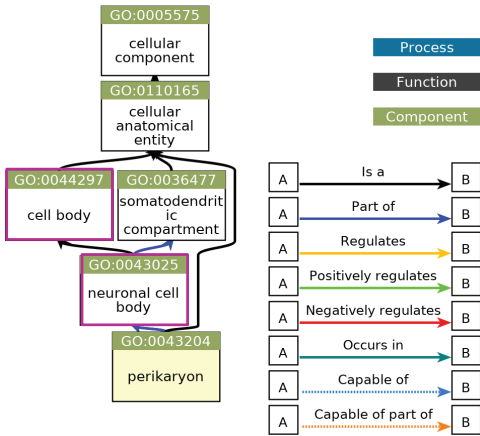

QuickGO - <https://www.ebi.ac.uk/QuickGO>

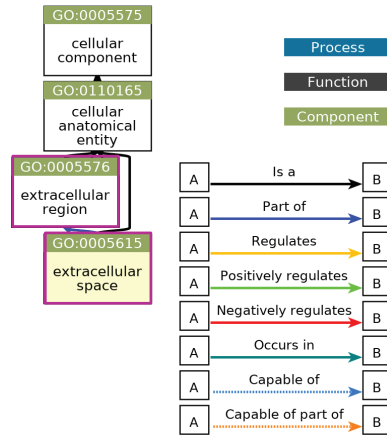

QuickGO - <https://www.ebi.ac.uk/QuickGO>

enriched category:

data base query: 21-05-31

(B) Reference: GO molecular function

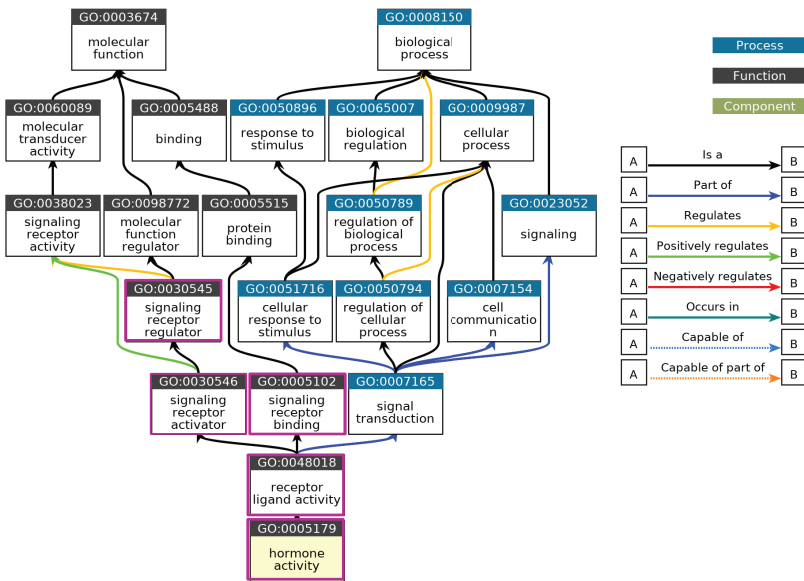

QuickGO - <https://www.ebi.ac.uk/QuickGO>

enriched category:

data base query: 21-05-31
