# Supplementary material for: Genetics of osteopontin in patients with chronic kidney disease: The German Chronic Kidney Disease study
Source: PubMed Central journal article supplement (PMC9015153; doi:10.1371/journal.pgen.1010139), 2022-04-06
Supplement: pgen.1010139.s010.pdf [file pgen.1010139.s010.pdf]

**S10 Figure:** Comparing summary statistics for the *KLKB1* locus from OPN GWAS (unconditional statistics, A) and the UK Biobank phenotype deep venous thrombosis (DVT, conditional statistics, B).

**(A) OPN GWAS results for *KLKB1* locus in GCKD study**

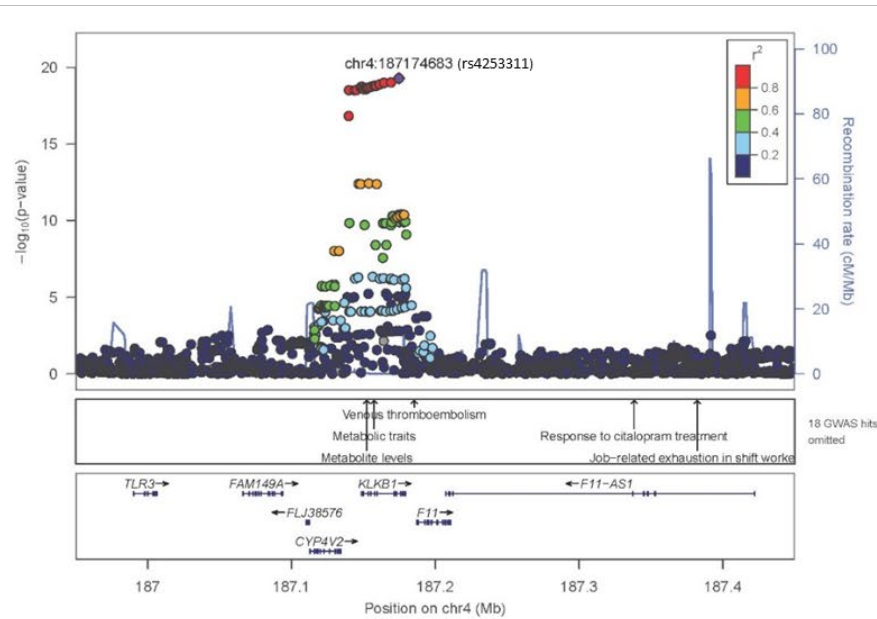

**(B) DVT GWAS results for *KLKB1* locus in UK Biobank after conditioning on rs4253399**

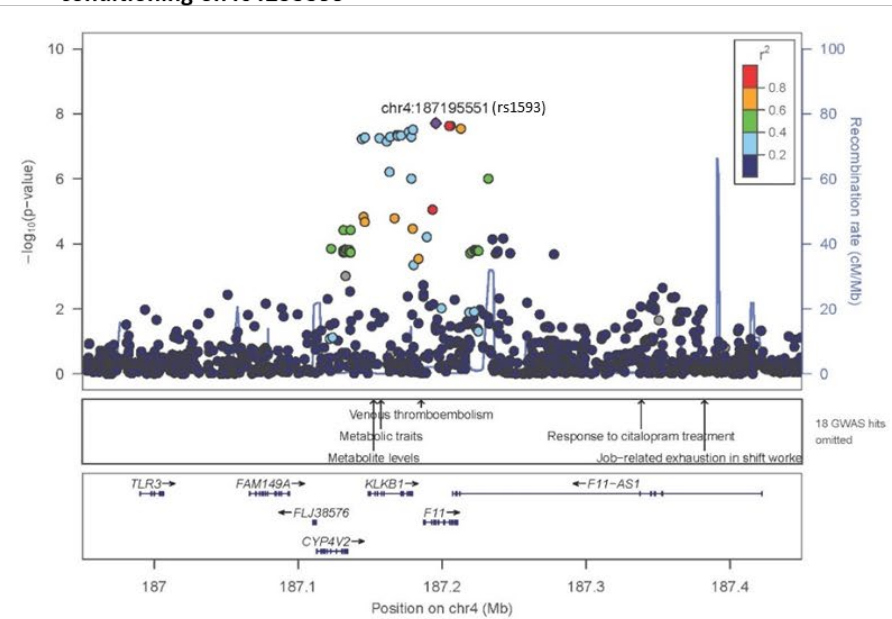

In conditional analysis, two independent SNPs for the *KLKB1* region were identified for the trait DVT in UK Biobank: 1) rs4253399 and 2) rs1593. Using summary statistics adjusted for rs4253399 of DVT (UK Biobank, B), colocalization with OPN GWAS signal (A) was observed ( $H_4: p_{12}=0.96$ ).
